# Supplementary material for: Maternal mortality ratios in 2852 Chinese counties, 1996–2015, and achievement of Millennium Development Goal 5 in China: a subnational analysis of the Global Burden of Disease Study 2016
Source: PubMed Central journal article supplement (PMC6336935; doi:10.1016/s0140-6736(18)31712-4), 2019-01-19

# THE LANCET

## Supplementary appendix

This appendix formed part of the original submission and has been peer reviewed. We post it as supplied by the authors.

Supplement to: Liang J, Li X, Kang C, et al. Maternal mortality ratios in 2852 Chinese counties, 1996–2015, and achievement of Millennium Development Goal 5 in China: a subnational analysis of the Global Burden of Disease Study 2016. *Lancet* 2018; published online Dec 13. [http://dx.doi.org/10.1016/S0140-6736\(18\)31712-4](http://dx.doi.org/10.1016/S0140-6736(18)31712-4).

## APPENDIX

Appendix Table 1. Model coefficients and standard errors for fixed effects

|                    | mean     | sd     |
|--------------------|----------|--------|
| Constant           | 127.9132 | 2.6034 |
| LDI [log scale]    | -0.2326  | 0.0147 |
| Maternal Education | -0.0583  | 0.0079 |
| Time               | -0.0667  | 0.0013 |

Appendix Figure 1. Distribution of MMR [log scale] from Annual Report on Maternal and Child Health, 1996-2015

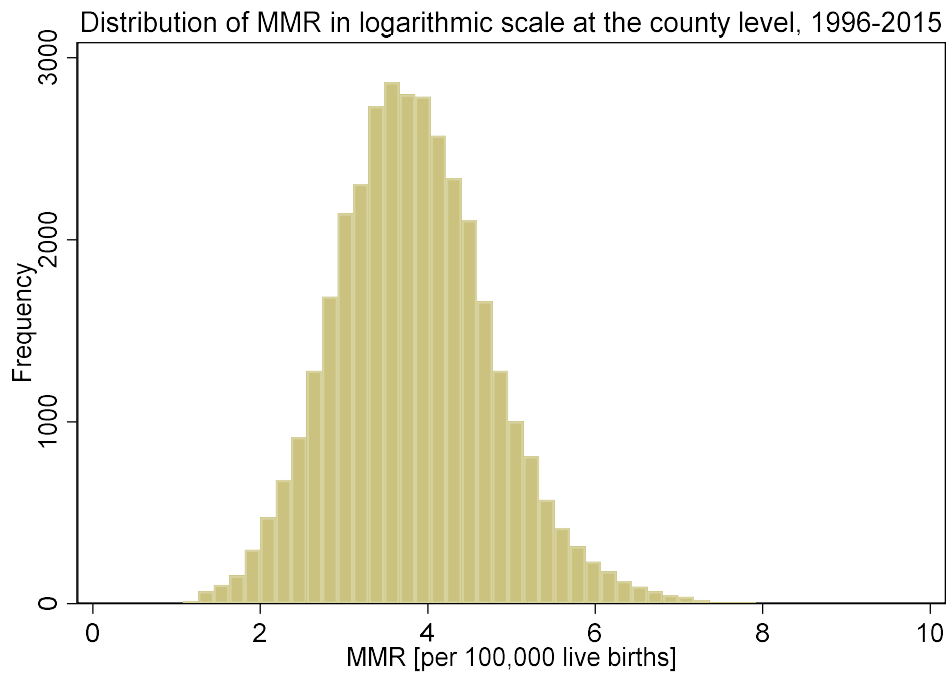

Supplement: mmc1.pdf [file mmc1.pdf]
